# Supplementary material for: Recruitment of Fkh1 to replication origins requires precisely positioned Fkh1/2 binding sites and concurrent assembly of the pre-replicative complex
Source: PLOS journal article supplement (doi:10.1371/journal.pgen.1006588), 2017-01-31
Supplement: S4 (10.1371/journal.pgen.1006588.s004) [file journal.pgen.1006588.s004]

A

|                      |                                                             |
|----------------------|-------------------------------------------------------------|
| Vps13_ARS607_wt      | CACTACATTTCGCTAAATTACATTATATTATTTTCGAGCTTTGTCT              |
| Vps13_ARS607_3' mut  | CACTACATTTCGCTAAATTACATTATATTATTTTCGAGCTTTGTCT              |
| Vps13_ARS607_10      | CACTACATTTCGCTAAATTACATTATATTATTTTCGAGCTTTGTCT              |
| Vps13_ARS607_30      | CACTACATTTCGCTAAATTACATTATATTATTTTCGAGCTTTGTCT              |
| Vps13_ARS607_60      | CACTACATTTCGCTAAATTACATTATATTATTTTCGAGCTTTGTCT              |
| Vps13_ARS607_90      | CACTACATTTCGCTAAATTACATTATATTATTTTCGAGCTTTGTCT              |
| Vps13_ARS607_120     | CACTACATTTCGCTAAATTACATTATATTATTTTCGAGCTTTGTCT              |
| Vps13_ARS607_150     | CACTACATTTCGCTAAATTACATTATATTATTTTCGAGCTTTGTCT              |
| Vps13_ARS607_240     | CACTACATTTCGCTAAATTACATTATATTATTTTCGAGCTTTGTCT              |
| Vps13_ARS607_300     | CACTACATTTCGCTAAATTACATTATATTATTTTCGAGCTTTGTCT              |
| Vps13_ARS607_-10 (1) | CACTACATTTCGCTAAATTACATTATATTATTTTCGAGCTTTGTCT              |
| Vps13_ARS607_-10 (2) | CACTACATTTCGCTAAATTACATTATATTATTTTCGAGCTTTGTCT              |
| Vps13_ARS607_+5      | CACTACATTTCGCTAAATTACATTATATTATTTTCGAGCTTTGTCT              |
| Vps13_ARS607_+10     | CACTACATTTCGCTAAATTACATTATATTATTTTCGAGCTTTGTCT              |
| Vps13_ARS607_+15     | CACTACATTTCGCTAAATTACATTATATTATTTTCGAGCTTTGTCT              |
| Vps13_ARS607_ACS_mut | CACTACATTTCGCTAAATTACATTATATTATTTTCGAGCTTTGTCT              |
|                      | *****                                                       |
|                      |                                                             |
| Vps13_ARS607_wt      | TGTTTATATTTAGTTAC-----GTTGGGATCAAGTTTTTAAAA-----            |
| Vps13_ARS607_3' mut  | TGTTTATATTTAGTTAC-----GTTGGGATCAAGTTTTTAAAA-----            |
| Vps13_ARS607_10      | TGTTTATATTTAGTTACGTAAATAAGCTTGTTGGGATCAAGTTTTTAAAA-----     |
| Vps13_ARS607_30      | TGTTTATATTTAGTTAC-----GTTGGGATCAAGTTTTTAAAAGTAAATAAGCT      |
| Vps13_ARS607_60      | TGTTTATATTTAGTTAC-----GTTGGGATCAAGTTTTTAAAA-----            |
| Vps13_ARS607_90      | TGTTTATATTTAGTTAC-----GTTGGGATCAAGTTTTTAAAA-----            |
| Vps13_ARS607_120     | TGTTTATATTTAGTTAC-----GTTGGGATCAAGTTTTTAAAA-----            |
| Vps13_ARS607_150     | TGTTTATATTTAGTTAC-----GTTGGGATCAAGTTTTTAAAA-----            |
| Vps13_ARS607_240     | TGTTTATATTTAGTTAC-----GTTGGGATCAAGTTTTTAAAA-----            |
| Vps13_ARS607_300     | TGTTTATATTTAGTTAC-----GTTGGGATCAAGTTTTTAAAA-----            |
| Vps13_ARS607_-10 (1) | TGTTTATATTTAGTTAC-----GTTGGGATCAAGTTTTTAAAA-----            |
| Vps13_ARS607_-10 (2) | TGTTTATATTTAGTTAC-----GTTGGGATCAAGTTTTTAAAA-----            |
| Vps13_ARS607_+5      | TGTTTATATTTAGTTAC-----GTTGGGATCAAGTTTTTAAAA-----            |
| Vps13_ARS607_+10     | TGTTTATATTTAGTTAC-----GTTGGGATCAAGTTTTTAAAA-----            |
| Vps13_ARS607_+15     | TGTTTATATTTAGTTAC-----GTTGGGATCAAGTTTTTAAAA-----            |
| Vps13_ARS607_ACS_mut | TGTTTATATCCAGTTAC-----GTTGGGATCAAGTTTTTAAAA-----            |
| ARS607_ACS sequence  | GTTTTATATTTA                                                |
|                      | *****.*****                                                 |
|                      |                                                             |
| Vps13_ARS607_wt      | -AACTAGATCTGGAGTGACCAAAAAAAAAAAT-----ACCCA-----             |
| Vps13_ARS607_3' mut  | -AACTAGATCTGGAGTGACCAAAAAAAAAAAT-----ACCCA-----             |
| Vps13_ARS607_10      | -AACTAGATCTGGAGTGACCAAAAAAAAAAAT-----ACCCA-----             |
| Vps13_ARS607_30      | TAACCTAGATCTGGAGTGACCAAAAAAAAAAAT-----ACCCA-----            |
| Vps13_ARS607_60      | -AACTAGATCTGGAGTGACCAAAAAAAAAAATGTAAATAAGCTTACCCA-----      |
| Vps13_ARS607_90      | -AACTAGATCTGGAGTGACCAAAAAAAAAAAT-----ACCCA-----             |
| Vps13_ARS607_120     | -AACTAGATCTGGAGTGACCAAAAAAAAAAAT-----ACCCA-----             |
| Vps13_ARS607_150     | -AACTAGATCTGGAGTGACCAAAAAAAAAAAT-----ACCCA-----             |
| Vps13_ARS607_240     | -AACTAGATCTGGAGTGACCAAAAAAAAAAAT-----ACCCA-----             |
| Vps13_ARS607_300     | -AACTAGATCTGGAGTGACCAAAAAAAAAAAT-----ACCCA-----             |
| Vps13_ARS607_-10 (1) | -AACTAGAT-----CAAAAAAAAAAAT-----ACCCA-----                  |
| Vps13_ARS607_-10 (2) | -AACTAGATCTGGAGTGACCAAAAAAAAAAAT-----ACCCA-----             |
| Vps13_ARS607_+5      | -AACTAGATCTGGAGTGACCAAAAAAAAAAAT-----ACCCAAGCTT-----        |
| Vps13_ARS607_+10     | -AACTAGATCTGGAGTGACCAAAAAAAAAAAT-----ACCCAAGCTTACTAG-----   |
| Vps13_ARS607_+15     | -AACTAGATCTGGAGTGACCAAAAAAAAAAAT-----ACCCAAGCTTACTAGAC----- |
| Vps13_ARS607_ACS_mut | -AACTAGATCTGGAGTGACCAAAAAAAAAAAT-----ACCCA-----             |
|                      | *****                                                       |



|                      |                                                               |
|----------------------|---------------------------------------------------------------|
| Vps13_ARS607_wt      | CGACACAATAGTTGTTTTTGTGTTCGTACCGAAGA-----AAAAGCCTTGTGCA        |
| Vps13_ARS607_3' mut  | CGACACAATAGTTGTTTTTGTGTTCGTACCGAAGA-----AAAAGCCTTGTGCA        |
| Vps13_ARS607_10      | CGACACAATAGTTGTTTTTGTGTTCGTACCGAAGA-----AAAAGCCTTGTGCA        |
| Vps13_ARS607_30      | CGACACAATAGTTGTTTTTGTGTTCGTACCGAAGA-----AAAAGCCTTGTGCA        |
| Vps13_ARS607_60      | CGACACAATAGTTGTTTTTGTGTTCGTACCGAAGA-----AAAAGCCTTGTGCA        |
| Vps13_ARS607_90      | CGACACAATAGTTGTTTTTGTGTTCGTACCGAAGA-----AAAAGCCTTGTGCA        |
| Vps13_ARS607_120     | CGACACAATAGTTGTTTTTGTGTTCGTACCGAAGA-----AAAAGCCTTGTGCA        |
| Vps13_ARS607_150     | CGACACAATAGTTGTTTTTGTGTTCGTACCGAAGA-----AAAAGCCTTGTGCA        |
| Vps13_ARS607_240     | CGACACAATAGTTGTTTTTGTGTTCGTACCGAAGAGTAAATAAGCTTAAAAGCCTTGTGCA |
| Vps13_ARS607_300     | CGACACAATAGTTGTTTTTGTGTTCGTACCGAAGA-----AAAAGCCTTGTGCA        |
| Vps13_ARS607_-10 (1) | CGACACAATAGTTGTTTTTGTGTTCGTACCGAAGA-----AAAAGCCTTGTGCA        |
| Vps13_ARS607_-10 (2) | CGACACAATAGTTGTTTTTGTGTTCGTACCGAAGA-----AAAAGCCTTGTGCA        |
| Vps13_ARS607_+5      | CGACACAATAGTTGTTTTTGTGTTCGTACCGAAGA-----AAAAGCCTTGTGCA        |
| Vps13_ARS607_+10     | CGACACAATAGTTGTTTTTGTGTTCGTACCGAAGA-----AAAAGCCTTGTGCA        |
| Vps13_ARS607_+15     | CGACACAATAGTTGTTTTTGTGTTCGTACCGAAGA-----AAAAGCCTTGTGCA        |
| Vps13_ARS607_ACS_mut | CGACACAATAGTTGTTTTTGTGTTCGTACCGAAGA-----AAAAGCCTTGTGCA        |
|                      | *****                                                         |

|                      |                                                               |
|----------------------|---------------------------------------------------------------|
| Vps13_ARS607_wt      | GAAAGCAAAAATAGTACACTTCTAGCCTTGATTACCAAGAGTTATG-----AC         |
| Vps13_ARS607_3' mut  | GAAAGCAAAAATAGTACACTTCTAGCCTTGATTACCAAGAGTTATG-----AC         |
| Vps13_ARS607_10      | GAAAGCAAAAATAGTACACTTCTAGCCTTGATTACCAAGAGTTATG-----AC         |
| Vps13_ARS607_30      | GAAAGCAAAAATAGTACACTTCTAGCCTTGATTACCAAGAGTTATG-----AC         |
| Vps13_ARS607_60      | GAAAGCAAAAATAGTACACTTCTAGCCTTGATTACCAAGAGTTATG-----AC         |
| Vps13_ARS607_90      | GAAAGCAAAAATAGTACACTTCTAGCCTTGATTACCAAGAGTTATG-----AC         |
| Vps13_ARS607_120     | GAAAGCAAAAATAGTACACTTCTAGCCTTGATTACCAAGAGTTATG-----AC         |
| Vps13_ARS607_150     | GAAAGCAAAAATAGTACACTTCTAGCCTTGATTACCAAGAGTTATG-----AC         |
| Vps13_ARS607_240     | GAAAGCAAAAATAGTACACTTCTAGCCTTGATTACCAAGAGTTATG-----AC         |
| Vps13_ARS607_300     | GAAAGCAAAAATAGTACACTTCTAGCCTTGATTACCAAGAGTTATGAGTAAATAAGCTTAC |
| Vps13_ARS607_-10 (1) | GAAAGCAAAAATAGTACACTTCTAGCCTTGATTACCAAGAGTTATG-----AC         |
| Vps13_ARS607_-10 (2) | GAAAGCAAAAATAGTACACTTCTAGCCTTGATTACCAAGAGTTATG-----AC         |
| Vps13_ARS607_+5      | GAAAGCAAAAATAGTACACTTCTAGCCTTGATTACCAAGAGTTATG-----AC         |
| Vps13_ARS607_+10     | GAAAGCAAAAATAGTACACTTCTAGCCTTGATTACCAAGAGTTATG-----AC         |
| Vps13_ARS607_+15     | GAAAGCAAAAATAGTACACTTCTAGCCTTGATTACCAAGAGTTATG-----AC         |
| Vps13_ARS607_ACS_mut | GAAAGCAAAAATAGTACACTTCTAGCCTTGATTACCAAGAGTTATG-----AC         |
|                      | *****                                                         |

|                      |                                    |
|----------------------|------------------------------------|
| Vps13_ARS607_wt      | AAAAATTTGCAGTTCAGAGTATACCTTAAAAACT |
| Vps13_ARS607_3' mut  | AAAAATTTGCAGTTCAGAGTATACCTTAAAAACT |
| Vps13_ARS607_10      | AAAAATTTGCAGTTCAGAGTATACCTTAAAAACT |
| Vps13_ARS607_30      | AAAAATTTGCAGTTCAGAGTATACCTTAAAAACT |
| Vps13_ARS607_60      | AAAAATTTGCAGTTCAGAGTATACCTTAAAAACT |
| Vps13_ARS607_90      | AAAAATTTGCAGTTCAGAGTATACCTTAAAAACT |
| Vps13_ARS607_120     | AAAAATTTGCAGTTCAGAGTATACCTTAAAAACT |
| Vps13_ARS607_150     | AAAAATTTGCAGTTCAGAGTATACCTTAAAAACT |
| Vps13_ARS607_240     | AAAAATTTGCAGTTCAGAGTATACCTTAAAAACT |
| Vps13_ARS607_300     | AAAAATTTGCAGTTCAGAGTATACCTTAAAAACT |
| Vps13_ARS607_-10 (1) | AAAAATTTGCAGTTCAGAGTATACCTTAAAAACT |
| Vps13_ARS607_-10 (2) | AAAAATTTGCAGTTCAGAGTATACCTTAAAAACT |
| Vps13_ARS607_+5      | AAAAATTTGCAGTTCAGAGTATACCTTAAAAACT |
| Vps13_ARS607_+10     | AAAAATTTGCAGTTCAGAGTATACCTTAAAAACT |
| Vps13_ARS607_+15     | AAAAATTTGCAGTTCAGAGTATACCTTAAAAACT |
| Vps13_ARS607_ACS_mut | AAAAATTTGCAGTTCAGAGTATACCTTAAAAACT |
|                      | *****                              |

B

|                        |                                                                                |
|------------------------|--------------------------------------------------------------------------------|
| VPS13_ARS305_3' rev    | GATTGTATA                                                                      |
| VPS13_ARS305_3' rev    | GATTGTATA                                                                      |
| VPS13_ARS305_5' rev    | GATTGTATA                                                                      |
| VPS13_ARS305_5',3' rev | GATTGTATA                                                                      |
| VPS13_ARS305_5' mut    | GATTGTATA                                                                      |
| VPS13_ARS305_ACS mut   | GATTGTATA                                                                      |
|                        | *****                                                                          |
| VPS13_ARS305 wt        | TCGATATATCAGAAACATACATATGATTTTTATCTTGTGAATATTCATCAAACCTCCGTTT                  |
| VPS13_ARS305_3' rev    | TCGATATATCAGAAACATACATATGATTTTTATCTTGTGAATATTCATCAAACCTCCGTTT                  |
| VPS13_ARS305_5' rev    | TCGATATATCAGAAACATACATATGATTTTTATCTTGTGAATATTCATCAAACCTCCGTTT                  |
| VPS13_ARS305_5',3' rev | TCGATATATCAGAAACATACATATGATTTTTATCTTGTGAATATTCATCAAACCTCCGTTT                  |
| VPS13_ARS305_5' mut    | TCGATATATCAGAAACATACATATGATTTTTATCTTGTGAATATTCATCAAACCTCCGTTT                  |
| VPS13_ARS305_ACS mut   | TCGATATATCAGAAACATACATATGATTTTTATCTTGTGAATATTCATCAAACCTCCGTTT                  |
|                        | *****                                                                          |
| VPS13_ARS305 wt        | TTAGCCCCCGTGTAAAGTTACTTTAATGAGTATTTGATCCTTTTTTTTTATTGTGTTGGTTT                 |
| VPS13_ARS305_3' rev    | TTAGCCCCCGTGTAAAGTTACTTTAATGAGTATTTGATCCTTTTTTTTTATTGTGTTGGTTT                 |
| VPS13_ARS305_5' rev    | TTAGCCCCCGTGTAAAGTTACTTTAATGAGTATTTGATCCTTTTTTTTTATTGTGTTGGTTT                 |
| VPS13_ARS305_5',3' rev | TTAGCCCCCGTGTAAAGTTACTTTAATGAGTATTTGATCCTTTTTTTTTATTGTGTTGGTTT                 |
| VPS13_ARS305_5' mut    | TTAGCCCCCGTGTAAAGTTACTTTAATGAGTATTTGATCCTTTTTTTTTATTGTGTTGGTTT                 |
| VPS13_ARS305_ACS mut   | TTAGCCCCCGTGTAAAGTTACTTTAATGAGTATTTGATCCTTTTTTTTTATTGTGTTGGTTT                 |
|                        | *****                                                                          |
| VPS13_ARS305 wt        | TTATATGTTTTGTTATGTAT <b>TGTTTAT</b> TTTCCCTTTAATTTTAGGATATGAAAACAAGAA          |
| VPS13_ARS305_3' rev    | TTATATGTTTTGTTATGTAT <b>TGTTTAT</b> TTTCCCTTTAATTTTAGGATATGAAAACAAGAA          |
| VPS13_ARS305_5' rev    | TTATATGTTTTGTTATGTAT <b>AATAAACAA</b> TTCCCTTTAATTTTAGGATATGAAAACAAGAA         |
| VPS13_ARS305_5',3' rev | TTATATGTTTTGTTATGTAT <b>AATAAACAA</b> TTCCCTTTAATTTTAGGATATGAAAACAAGAA         |
| VPS13_ARS305_5' mut    | TTATATGTTTTGTTATGTAT <b>CT</b> CTATTTTCCCTTTAATTTTAGGATATGAAAACAAGAA           |
| VPS13_ARS305_ACS mut   | TTATATG <b>GGT</b> TGTTATGTAT <b>TGTTTAT</b> TTTCCCTTTAATTTTAGGATATGAAAACAAGAA |
| ARS 305 ACS sequence   | <b>TTATATGTTTT</b><br>*****                                                    |
| VPS13_ARS305 wt        | TTTATCAAAGAAAAAATCTTAGCTTTAAGAACTACAA <b>GTAAATA</b> AAAAATAATAAATC            |
| VPS13_ARS305_3' rev    | TTTATCAAAGAAAAAATCTTAGCTTTAAGAACTACAA <b>TTATTTACT</b> AAAAATAATAAATC          |
| VPS13_ARS305_5' rev    | TTTATCAAAGAAAAAATCTTAGCTTTAAGAACTACAA <b>GTAAATA</b> AAAAATAATAAATC            |
| VPS13_ARS305_5',3' rev | TTTATCAAAGAAAAAATCTTAGCTTTAAGAACTACAA <b>TTATTTACT</b> AAAAATAATAAATC          |
| VPS13_ARS305_5' mut    | TTTATCAAAGAAAAAATCTTAGCTTTAAGAACTACAA <b>GTAAATA</b> AAAAATAATAAATC            |
| VPS13_ARS305_ACS mut   | TTTATCAAAGAAAAAATCTTAGCTTTAAGAACTACAA <b>GTAAATA</b> AAAAATAATAAATC            |
|                        | *****                                                                          |
| VPS13_ARS305 wt        | ACACCGGACAGTACATGAAACT                                                         |
| VPS13_ARS305_3' rev    | ACACCGGACAGTACATGAAACT                                                         |
| VPS13_ARS305_5' rev    | ACACCGGACAGTACATGAAACT                                                         |
| VPS13_ARS305_5',3' rev | ACACCGGACAGTACATGAAACT                                                         |
| VPS13_ARS305_5' mut    | ACACCGGACAGTACATGAAACT                                                         |
| VPS13_ARS305_ACS mut   | ACACCGGACAGTACATGAAACT                                                         |
|                        | *****                                                                          |

**S4 Fig.** Full sequences of ARS607 (A) and ARS305 (B) inserted into VPS13 locus are shown. Modified or deleted nucleotides are highlighted in red and Fkh1/2 consesnsus sequences are highlighted in turquoise. The inserted sequences are indicated in **bold and underlined**.
